# Supplementary material
Source: publisher figshare collection journal article supplement (https://asha.figshare.com/articles/dataset/_/20405673)
Supplement: Supplementary file 2 [file 1]

## Supplemental Material S1. Survey.

### Screening Questions

1. Are you 18 years or older? [Yes/No]  
→ If No, exclude from the survey.
2. Are you a licensed SLP in the U.S. or Puerto Rico? [Yes/No]  
→ If No, exclude from the survey.
3. Which of the following titles do you hold in your current position?
  - a. Speech-Language Pathologist with ASHA certification (CCC-SLP)
  - b. Speech-Language Pathologist in the U.S. or Puerto Rico (state license only, not ASHA certified)
  - c. Clinical Fellow (CF-SLP)
  - d. Pursuing a temporary license to become state licensed only
  - e. None of these apply to me→ If "None of these apply to me", exclude from the survey.
4. As a speech-language pathologist, do you work with children (ages 0 – 21) who are emergent bilinguals? [Yes/No]  
**Definition of emergent bilinguals:** *any child who comes from a home where a language other than or in addition to English is spoken by some members of the family, regardless of proficiency level. This includes children who may not be using spoken language as well as children with language impairments or intellectual disabilities.*  
→ If No, exclude from the survey.
5. Do any of the emergent bilinguals you provide SLP services to use AAC? [Yes/No]  
**Definition of an AAC user:** *any child who communicates using aided or unaided augmentative and alternative communication (AAC) modalities to supplement or replace their speech. AAC systems may be high tech (e.g., speech-generating devices, mobile technologies with AAC apps) or low tech (communication boards or books) and may or may not include both of the child's languages and may or may not be the child's primary communication modality.*  
→ If No, exclude from the survey.

Continue to next page.

## Demographics

6. What is your gender?
  - a. Male
  - b. Female
  - c. Genderqueer
  - d. Non-binary
  - e. Gender fluid
  - f. Gender identity not listed
  - g. I choose not to answer this question.
  
7. What is your race/ethnicity? (select all that apply)
  - ☐ White/Caucasian
  - ☐ Black or African American
  - ☐ Hispanic or Latinx
  - ☐ Asian
    - ☐ East Asian
    - ☐ South Asian
    - ☐ Southeast Asian
  - ☐ Native American/Indigenous
  - ☐ Pacific Islander
  - ☐ Other \_\_\_\_\_
  - ☐ I choose not to answer this question.
  
8. In what age range do you fall?
  - a. Under 25 years
  - b. 25-34 years
  - c. 35-44 years
  - d. 45-54 years
  - e. 55-64 years
  - a. 65-74 years
  - b. 75 years and over
  - c. I choose not to answer this question.
  
9. Do you speak or understand any language other than English? [Yes/No]  
→ If No, go to question 12.
  
10. How many languages in addition to English do you speak or understand?
  - a. 1
  - b. 2
  - c. 3
  - d. 4
  - e. 5

11. Name the language(s) in addition to English that you speak or understand.

- i. Language A \_\_\_\_\_
- ii. Language B \_\_\_\_\_
- iii. Language C \_\_\_\_\_
- iv. Language D \_\_\_\_\_
- v. Language E \_\_\_\_\_

a. Rate your proficiency (in Language A, B, C, D, E if applicable)

|                     | Novice<br>(I can communicate minimally with formulaic and rote utterances, lists, and phrases) | Intermediate<br>(I can generate simple messages on familiar topics and handle a simple situation or transaction) | Advanced<br>(I can narrate and describe in all major tenses and handle a situation without complication) | Superior<br>(I can support opinion, hypothesize, discuss topics concretely and abstractly and handle a linguistically unfamiliar situation) | I am a native speaker |
|---------------------|------------------------------------------------------------------------------------------------|------------------------------------------------------------------------------------------------------------------|----------------------------------------------------------------------------------------------------------|---------------------------------------------------------------------------------------------------------------------------------------------|-----------------------|
| Language A<br>_____ |                                                                                                |                                                                                                                  |                                                                                                          |                                                                                                                                             |                       |
| Language B<br>_____ |                                                                                                |                                                                                                                  |                                                                                                          |                                                                                                                                             |                       |
| Language C<br>_____ |                                                                                                |                                                                                                                  |                                                                                                          |                                                                                                                                             |                       |
| Language D<br>_____ |                                                                                                |                                                                                                                  |                                                                                                          |                                                                                                                                             |                       |
| Language E<br>_____ |                                                                                                |                                                                                                                  |                                                                                                          |                                                                                                                                             |                       |

12. How many years have you been an SLP? \_\_\_\_\_

13. During an average calendar year, how many clients (best estimate) are on your case load (include all clients)?

- a. Less than 10
- b. 10-19
- c. 20-39
- d. 40-59
- e. 60-79
- f. More than 80

14. During an average calendar year, how many clients on your case load are emergent bilinguals who use AAC?

- a. 1-2
- b. 3-5
- c. 6-10
- d. 11-20
- e. 21-30
- f. More than 30

15. From the following list, select the AAC systems that are used by any of your clients who were emergent bilinguals.

- ☐ AAC device or mobile technology with vocabulary and voice output in English only
- ☐ AAC device or mobile technology with vocabulary and voice output in their home language only
- ☐ AAC device or mobile technology with vocabulary and voice output in BOTH English and their home language
- ☐ Low tech AAC system with vocabulary in English only
- ☐ Low tech AAC system with vocabulary in their home language only
- ☐ Low tech AAC system with vocabulary in BOTH English and their home language
- ☐ Other \_\_\_\_\_

16. During an average calendar year, how frequently do you work with emergent bilinguals who used AAC in each setting? (If you do not work in a particular setting, choose "Never").

|                                         |       |        |           |       |        |
|-----------------------------------------|-------|--------|-----------|-------|--------|
| a. School                               | Never | Rarely | Sometimes | Often | Always |
| b. Clinic                               | Never | Rarely | Sometimes | Often | Always |
| c. Private Practice                     | Never | Rarely | Sometimes | Often | Always |
| d. University or Research Setting       | Never | Rarely | Sometimes | Often | Always |
| e. Rehabilitation/Habilitation Facility | Never | Rarely | Sometimes | Often | Always |
| f. Hospital                             | Never | Rarely | Sometimes | Often | Always |
| g. Home Health                          | Never | Rarely | Sometimes | Often | Always |
| h. Other: _____                         | Never | Rarely | Sometimes | Often | Always |

17. During an average calendar year, how frequently do you work with emergent bilinguals who use AAC in each age group? (If you do not work with a particular age group, choose "Never").

|               |       |        |           |       |        |
|---------------|-------|--------|-----------|-------|--------|
| a. Ages 0-2   | Never | Rarely | Sometimes | Often | Always |
| b. Ages 3-5   | Never | Rarely | Sometimes | Often | Always |
| c. Ages 6-11  | Never | Rarely | Sometimes | Often | Always |
| d. Ages 12-21 | Never | Rarely | Sometimes | Often | Always |

18. During an average calendar year, which of the following languages are spoken by the emergent bilinguals who use AAC on your caseload? (select all that apply)

- ☐ Arabic
- ☐ Chinese
- ☐ French
- ☐ German
- ☐ Hebrew
- ☐ Hindi
- ☐ Hmong
- ☐ Italian
- ☐ Korean
- ☐ Portuguese
- ☐ Russian
- ☐ Spanish
- ☐ Tagalog
- ☐ Vietnamese
- ☐ Other \_\_\_\_\_

19. Have you had training in assessment and intervention services for multicultural/multilingual populations? [Yes/No]

→ If No, go to question 21.

20. In which context did you receive that training in services for multicultural/multilingual populations? (select all that apply)

- ☐ Undergraduate coursework
- ☐ Graduate coursework
- ☐ Seminar
- ☐ Clinical Practicum
- ☐ Self-study
- ☐ On-the-job training
- ☐ Continuing education
- ☐ Other \_\_\_\_\_

21. Please rate each statement according to the following scale:

My graduate program provided me with sufficient theoretical knowledge about assessment and intervention for emergent bilinguals who use AAC?

Strongly  
agree

Somewhat  
agree

Neutral

Somewhat  
disagree

Strongly  
disagree

|                                                                                                                                            |                |                |         |                   |                   |
|--------------------------------------------------------------------------------------------------------------------------------------------|----------------|----------------|---------|-------------------|-------------------|
| My graduate program provided me with sufficient practical experience with assessment and intervention for emergent bilinguals who use AAC. | Strongly agree | Somewhat agree | Neutral | Somewhat disagree | Strongly disagree |
|--------------------------------------------------------------------------------------------------------------------------------------------|----------------|----------------|---------|-------------------|-------------------|

22. In what state do you primarily work? \_\_\_\_\_

23. Describe the geographic location where you work.

- a. Rural
- b. Suburban
- c. Urban

**Continue to next page.**

## Impact of COVID-19 on Services

*We would like to know how the COVID-19 pandemic has affected the assessment and intervention services you provided to your clients who are emergent bilinguals who use AAC and how these services have changed over time.*

1. What type of **assessment** services did you provide to the emergent bilinguals who use AAC on your caseload at each of these time points? (select all that apply)

|                                | in-person | telepractice | no services | other (please specify) |
|--------------------------------|-----------|--------------|-------------|------------------------|
| Prior to the COVID-19 pandemic |           |              |             |                        |
| March – July 2020              |           |              |             |                        |
| August 2020 – Present          |           |              |             |                        |

2. What type of **intervention** services did you provide to the emergent bilinguals who use AAC on your caseload at each of these time points? (select all that apply)

|                                | in-person | telepractice | no services | other (please specify) |
|--------------------------------|-----------|--------------|-------------|------------------------|
| Prior to the COVID-19 pandemic |           |              |             |                        |
| March – July 2020              |           |              |             |                        |
| August 2020 – Present          |           |              |             |                        |

3. For your clients who were emergent bilinguals who use AAC, what were the challenges that you or your clients and their families experienced related to AAC **assessment**? (select all that apply)

|                                | Language barrier | Technology barriers | Lack of/limited availability of caregivers | Limited funding for therapy and/or AAC | No barriers | Other (please specify) |
|--------------------------------|------------------|---------------------|--------------------------------------------|----------------------------------------|-------------|------------------------|
| Prior to the COVID-19 pandemic |                  |                     |                                            |                                        |             |                        |
| March – July 2020              |                  |                     |                                            |                                        |             |                        |
| August 2020 – Present          |                  |                     |                                            |                                        |             |                        |

4. For your clients who were emergent bilinguals who use AAC, what were the challenges that you or your clients and their families experienced related to AAC **intervention**? (select all that apply)

|                                | Language barrier | Technology barriers | Lack of/limited availability of caregivers | Limited funding for therapy and/or AAC | No barriers | Other (please specify) |
|--------------------------------|------------------|---------------------|--------------------------------------------|----------------------------------------|-------------|------------------------|
| Prior to the COVID-19 pandemic |                  |                     |                                            |                                        |             |                        |
| March – July 2020              |                  |                     |                                            |                                        |             |                        |
| August 2020 – Present          |                  |                     |                                            |                                        |             |                        |

5. Overall, my clients who are emergent bilinguals who use AAC were able to meet their intervention goals.

|                                |       |        |           |       |        |
|--------------------------------|-------|--------|-----------|-------|--------|
| Prior to the COVID-19 pandemic | Never | Rarely | Sometimes | Often | Always |
| March – July 2020              | Never | Rarely | Sometimes | Often | Always |
| August 2020 – Present          | Never | Rarely | Sometimes | Often | Always |

6. Overall, as a result of the recent COVID-19 restrictions, collaboration with the families of my clients who are emergent bilinguals who use AAC...

- ...increased.
- ...decreased.
- ...remained the same.
- ...ceased.

7. Are there any other comments you would like to make about your experience providing services during the COVID-19 pandemic to your clients who are emergent bilinguals who use AAC?

**End of survey.**
